# Supplementary material for: Combining genome-wide and transcriptome-wide analyses reveal the evolutionary conservation and functional diversity of aquaporins in cotton
Source: PubMed Central journal article supplement (PMC6604486; doi:10.1186/s12864-019-5928-2), 2019-07-01
Supplement: 12864_2019_5928_MOESM11_ESM.pdf [file 12864_2019_5928_MOESM11_ESM.pdf]

|                               |                                                                                                  |                                                               |      |
|-------------------------------|--------------------------------------------------------------------------------------------------|---------------------------------------------------------------|------|
| ZJU A10_113947127-113948250 - | TGCCAGAGACTCTCAGTCCTGTAAGTT                                                                      | TCATCAAATGAATGATTGATTGTTTAAACCATATAAACCAGATTTTTAACCATACCATGTG | 794  |
| HAU A10_113550255-113551380 + | TGCCAGAGACTCTCAGTCCTGTAAGTTCAATTTCTTCAAT                                                         | TGAATGATTGATTGTTTAAACCATATAATGA                               | 795  |
| HAU A10_113558379-113559503 - | TGCCAGAGACTCTCAGTCCTGTAAGTTCAATTTCTTCAAT                                                         | TGAATGATTGATTGTTTAAACCATATAATGA                               | 795  |
| HAU A10_113569139-113570262 - | TGCCAGAGACTCTCAGTCCTGTAAGTT                                                                      | TCATCAAATGAATGATTGATTGTTTAAACCATATAAACCAGATTTTTAACCATACCATGTG | 794  |
| NAU A10_99656268-99657211 +   | TTTGGTAGATTCTGGCACCATTGCCAATTGGGTCGCAGTGTCTTGGTGCACCTAGCCACCATCCCAATCAGAGAACGGTATTAACCCAGCTCGTAG |                                                               | 895  |
| NAU A10_99664641-99665584 -   | TTTGGTAGATTCTGGCACCATTGCCAATTGGGTCGCAGTGTCTTGGTGCACCTAGCCACCATCCCAATCAGAGAACGGTATTAACCCAGCTCGTAG |                                                               | 895  |
| NAU A10_99675191-99676314 -   | TTTGGTAGATTCTGGCACCATTGCCAATTGGGTCGCAGTGTCTTGGTGCACCTAGCCACCATCCCAATCAGAGAACGGTATTAACCCAGCTCGTAG |                                                               | 894  |
| ZJU A10_113928852-113929978 + | TTTGGTAGATTCTGGCACCATTGCCAATTGGGTCGCAGTGTCTTGGTGCACCTAGCCACCATCCCAATCAGAGAACGGTATTAACCCAGCTCGTAG |                                                               | 895  |
| ZJU A10_113936978-113938102 - | TTTGGTAGATTCTGGCACCATTGCCAATTGGGTCGCAGTGTCTTGGTGCACCTAGCCACCATCCCAATCAGAGAACGGTATTAACCCAGCTCGTAG |                                                               | 895  |
| ZJU A10_113947127-113948250 - | TTTGGTAGATTCTGGCACCATTGCCAATTGGGTCGCAGTGTCTTGGTGCACCTAGCCACCATCCCAATCAGAGAACGGTATTAACCCAGCTCGTAG |                                                               | 894  |
| HAU A10_113550255-113551380 + | TTTGGTAGATTCTGGCACCATTGCCAATTGGGTCGCAGTGTCTTGGTGCACCTAGCCACCATCCCAATCAGAGAACGGTATTAACCCAGCTCGTAG |                                                               | 895  |
| HAU A10_113558379-113559503 - | TTTGGTAGATTCTGGCACCATTGCCAATTGGGTCGCAGTGTCTTGGTGCACCTAGCCACCATCCCAATCAGAGAACGGTATTAACCCAGCTCGTAG |                                                               | 895  |
| HAU A10_113569139-113570262 - | TTTGGTAGATTCTGGCACCATTGCCAATTGGGTCGCAGTGTCTTGGTGCACCTAGCCACCATCCCAATCAGAGAACGGTATTAACCCAGCTCGTAG |                                                               | 894  |
| NAU A10_99656268-99657211 +   | TCTTGGTGCAGCCATCATTTCAACAAGGACAAGGGTGGGATGACCAT                                                  |                                                               | 944  |
| NAU A10_99664641-99665584 -   | TCTTGGTGCAGCCATCATTTCAACAAGGACAAGGGTGGGATGACCAT                                                  |                                                               | 944  |
| NAU A10_99675191-99676314 -   | CCTTGGTGCAGCCATCATTTCAACAAGGACAAGGGTGGGATGACCATGTAAGT                                            | CAATTGTTTCACCATTTTCACTATTATTTT                                | 991  |
| ZJU A10_113928852-113929978 + | TCTTGGTGCAGCCATCATTTCAACAAGGACAAGGGTGGGATGACCATGTAAGT                                            | CAATTGTTTCACCATTTTCACTATTATTTT                                | 994  |
| ZJU A10_113936978-113938102 - | TCTTGGTGCAGCCATCATTTCAACAAGGACAAGGGTGGGATGACCATGTAAGT                                            | CAATTGTTTCACCATTTTCACTATTATTTT                                | 994  |
| ZJU A10_113947127-113948250 - | CCTTGGTGCAGCCATCATTTCAACAAGGACAAGGGTGGGATGACCATGTAAGT                                            | CAATTGTTTCACCATTTTCACTATTATTTT                                | 991  |
| HAU A10_113550255-113551380 + | TCTTGGTGCAGCCATCATTTCAACAAGGACAAGGGTGGGATGACCATGTAAGT                                            | CAATTGTTTCACCATTTTCACTATTATTTT                                | 993  |
| HAU A10_113558379-113559503 - | TCTTGGTGCAGCCATCATTTCAACAAGGACAAGGGTGGGATGACCATGTAAGT                                            | CAATTGTTTCACCATTTTCACTATTATTTT                                | 994  |
| HAU A10_113569139-113570262 - | CCTTGGTGCAGCCATCATTTCAACAAGGACAAGGGTGGGATGACCATGTAAGT                                            | CAATTGTTTCACCATTTTCACTATTATTTT                                | 991  |
| NAU A10_99656268-99657211 +   |                                                                                                  |                                                               | 944  |
| NAU A10_99664641-99665584 -   |                                                                                                  |                                                               | 944  |
| NAU A10_99675191-99676314 -   | AATAATATACTTATCTACTTTGGGTCATGTTTCTGCAGTGGATTCTGGGTGGGTCCATTTCATTGGTGCAGCACTAGCAGCACTTACCACGTTGTT |                                                               | 1091 |
| ZJU A10_113928852-113929978 + | AATGATATACTTATCTACTTTGGGTCATGTTTCTGCAGTGGATTCTGGGTGGGTCCATTTCATTGGTGCAGCACTAGCAGCACTTACCACGTTGTT |                                                               | 1094 |
| ZJU A10_113936978-113938102 - | AATGATATACTTATCTACTTTGGGTCATGTTTCTGCAGTGGATTCTGGGTGGGTCCATTTCATTGGTGCAGCACTAGCAGCACTTACCACGTTGTT |                                                               | 1092 |
| ZJU A10_113947127-113948250 - | AATAATATACTTATCTACTTTGGGTCATGTTTCTGCAGTGGATTCTGGGTGGGTCCATTTCATTGGTGCAGCACTAGCAGCACTTACCACGTTGTT |                                                               | 1091 |
| HAU A10_113550255-113551380 + | AATGATATACTTATCTACTTTGGGTCATGTTTCTGCAGTGGATTCTGGGTGGGTCCATTTCATTGGTGCAGCACTAGCAGCACTTACCACGTTGTT |                                                               | 1093 |
| HAU A10_113558379-113559503 - | AATGATATACTTATCTACTTTGGGTCATGTTTCTGCAGTGGATTCTGGGTGGGTCCATTTCATTGGTGCAGCACTAGCAGCACTTACCACGTTGTT |                                                               | 1092 |
| HAU A10_113569139-113570262 - | AATAATATACTTATCTACTTTGGGTCATGTTTCTGCAGTGGATTCTGGGTGGGTCCATTTCATTGGTGCAGCACTAGCAGCACTTACCACGTTGTT |                                                               | 1091 |
| NAU A10_99656268-99657211 +   |                                                                                                  |                                                               | 944  |
| NAU A10_99664641-99665584 -   |                                                                                                  |                                                               | 944  |
| NAU A10_99675191-99676314 -   | GTGATCAGAGCCATTCCTTTCAAATCAAAATGA                                                                |                                                               | 1124 |
| ZJU A10_113928852-113929978 + | GTATCAGGGCCATTCCTTTCAAGTCAAAATGA                                                                 |                                                               | 1127 |
| ZJU A10_113936978-113938102 - | GTGATCAGAGCCATTCCTTTCAAATCAAAATGA                                                                |                                                               | 1125 |
| ZJU A10_113947127-113948250 - | GTGATCAGAGCCATTCCTTTCAAATCAAAATGA                                                                |                                                               | 1124 |
| HAU A10_113550255-113551380 + | GTATCAGGGCCATTCCTTTCAAGTCAAAATGA                                                                 |                                                               | 1126 |
| HAU A10_113558379-113559503 - | GTGATCAGAGCCATTCCTTTCAAATCAAAATGA                                                                |                                                               | 1125 |
| HAU A10_113569139-113570262 - | GTGATCAGAGCCATTCCTTTCAAATCAAAATGA                                                                |                                                               | 1124 |
