# Supplementary material for: Combining genome-wide and transcriptome-wide analyses reveal the evolutionary conservation and functional diversity of aquaporins in cotton
Source: PubMed Central journal article supplement (PMC6604486; doi:10.1186/s12864-019-5928-2), 2019-07-01
Supplement: 12864_2019_5928_MOESM12_ESM.pdf [file 12864_2019_5928_MOESM12_ESM.pdf]

**Additional file 12: Figure S6.** Sequences alignment of *GhPIP2;2a\_At*, *GhPIP2;2e\_At*, *GhPIP2;2a\_Dt* and *GhPIP2;2e\_Dt* in three genome databases of *G. hirsutum* L. acc. TM-1.

| A                              |                                    | B   |                   | C |  |
|--------------------------------|------------------------------------|-----|-------------------|---|--|
| NAU A01_98366726-98367857 +    | ATGGGTAAGGATGTGAGGTTGGTGGTGGAGTTC  | 100 | Gh_A01G1844       |   |  |
| NAU A01_98361882-98363012 +    | ATGGGTAAGGATGTGAGGTTGGTGGTGGAGTTC  | 100 | Gh_A01G1843       |   |  |
| NAU D01_59898611-59899741 +    | ATGGGTAAGGATGTGAGGTTGGTGGTGGAGTTC  | 100 | Gh_D01G2086       |   |  |
| NAU D01_59890054-59891184 +    | ATGGGTAAGGATGTGAGGTTGGTGGTGGAGTTC  | 100 | Gh_D01G2085       |   |  |
| ZJU A01_116473274-116474405 +  | ATGGGTAAGGATGTGAGGTTGGTGGTGGAGTTC  | 100 | GH_A01G2321       |   |  |
| ZJU A01_116468430-116469560 +  | ATGGGTAAGGATGTGAGGTTGGTGGTGGAGTTC  | 100 | GH_A01G2320       |   |  |
| ZJU D01_63074368-63075498 +    | ATGGGTAAGGATGTGAGGTTGGTGGTGGAGTTC  | 100 | GH_D01G2400       |   |  |
| ZJU scaffold_D01_84-385/46-787 | ATGGGTAAGGATGTGAGGTTGGTGGTGGAGTTC  | 100 | Unknown           |   |  |
| HAU A01_116031840-116032971 +  | ATGGGTAAGGATGTGAGGTTGGTGGTGGAGTTC  | 100 | Ghir_A01G020720.1 |   |  |
| HAU A01_116027001-116028131 +  | ATGGGTAAGGATGTGAGGTTGGTGGTGGAGTTC  | 100 | Ghir_A01G020720.1 |   |  |
| HAU D01_61617884-61619012 +    | ATGGGTAAGGATGTGAGGTTGGTGGTGGAGTTC  | 100 | Ghir_D01G022260.1 |   |  |
| HAU D01_61609329-61610459 +    | ATGGGTAAGGATGTGAGGTTGGTGGTGGAGTTC  | 100 | Ghir_D01G022270.1 |   |  |
| NAU A01_98366726-98367857 +    | CTTTTAAAGGGCTATAATAGCTGAGTTTCATTG  | 200 |                   |   |  |
| NAU A01_98361882-98363012 +    | CTTTTAAAGGGCTATAATAGCTGAGTTTCATTG  | 200 |                   |   |  |
| NAU D01_59898611-59899741 +    | CTTTTAAAGGGCTATAATAGCTGAGTTTCATTG  | 200 |                   |   |  |
| NAU D01_59890054-59891184 +    | CTTTTAAAGGGCTATAATAGCTGAGTTTCATTG  | 200 |                   |   |  |
| ZJU A01_116473274-116474405 +  | CTTTTAAAGGGCTATAATAGCTGAGTTTCATTG  | 200 |                   |   |  |
| ZJU A01_116468430-116469560 +  | CTTTTAAAGGGCTATAATAGCTGAGTTTCATTG  | 200 |                   |   |  |
| ZJU D01_63074368-63075498 +    | CTTTTAAAGGGCTATAATAGCTGAGTTTCATTG  | 200 |                   |   |  |
| ZJU scaffold_D01_84-385/46-787 | CTTTTAAAGGGCTATAATAGCTGAGTTTCATTG  | 200 |                   |   |  |
| HAU A01_116031840-116032971 +  | CTTTTAAAGGGCTATAATAGCTGAGTTTCATTG  | 200 |                   |   |  |
| HAU A01_116027001-116028131 +  | CTTTTAAAGGGCTATAATAGCTGAGTTTCATTG  | 200 |                   |   |  |
| HAU D01_61617884-61619012 +    | CTTTTAAAGGGCTATAATAGCTGAGTTTCATTG  | 200 |                   |   |  |
| HAU D01_61609329-61610459 +    | CTTTTAAAGGGCTATAATAGCTGAGTTTCATTG  | 200 |                   |   |  |
| NAU A01_98366726-98367857 +    | TAAGGGTGGTCAAGATTGTGATGGTGTGGCATT  | 300 |                   |   |  |
| NAU A01_98361882-98363012 +    | TAAGGGTGGTCAAGATTGTGATGGTGTGGCATT  | 300 |                   |   |  |
| NAU D01_59898611-59899741 +    | TAAGGGTGGTCAAGATTGTGATGGTGTGGCATT  | 300 |                   |   |  |
| NAU D01_59890054-59891184 +    | TAAGGGTGGTCAAGATTGTGATGGTGTGGCATT  | 300 |                   |   |  |
| ZJU A01_116473274-116474405 +  | TAAGGGTGGTCAAGATTGTGATGGTGTGGCATT  | 300 |                   |   |  |
| ZJU A01_116468430-116469560 +  | TAAGGGTGGTCAAGATTGTGATGGTGTGGCATT  | 300 |                   |   |  |
| ZJU D01_63074368-63075498 +    | TAAGGGTGGTCAAGATTGTGATGGTGTGGCATT  | 300 |                   |   |  |
| ZJU scaffold_D01_84-385/46-787 | TAAGGGTGGTCAAGATTGTGATGGTGTGGCATT  | 300 |                   |   |  |
| HAU A01_116031840-116032971 +  | TAAGGGTGGTCAAGATTGTGATGGTGTGGCATT  | 300 |                   |   |  |
| HAU A01_116027001-116028131 +  | TAAGGGTGGTCAAGATTGTGATGGTGTGGCATT  | 300 |                   |   |  |
| HAU D01_61617884-61619012 +    | TAAGGGTGGTCAAGATTGTGATGGTGTGGCATT  | 300 |                   |   |  |
| HAU D01_61609329-61610459 +    | TAAGGGTGGTCAAGATTGTGATGGTGTGGCATT  | 300 |                   |   |  |
| NAU A01_98366726-98367857 +    | GGTAATAATATCTTATACACACTCGTTTGAACG  | 400 |                   |   |  |
| NAU A01_98361882-98363012 +    | GGTAATAATATCTTATACACACTCGTTTGAACG  | 400 |                   |   |  |
| NAU D01_59898611-59899741 +    | GGTAATAATATCTTATACACACTCGTTTGAACG  | 400 |                   |   |  |
| NAU D01_59890054-59891184 +    | GGTAATAATATCTTATACACACTCGTTTGAACG  | 400 |                   |   |  |
| ZJU A01_116473274-116474405 +  | GGTAATAATATCTTATACACACTCGTTTGAACG  | 400 |                   |   |  |
| ZJU A01_116468430-116469560 +  | GGTAATAATATCTTATACACACTCGTTTGAACG  | 400 |                   |   |  |
| ZJU D01_63074368-63075498 +    | GGTAATAATATCTTATACACACTCGTTTGAACG  | 400 |                   |   |  |
| ZJU scaffold_D01_84-385/46-787 | GGTAATAATATCTTATACACACTCGTTTGAACG  | 313 |                   |   |  |
| HAU A01_116031840-116032971 +  | GGTAATAATATCTTATACACACTCGTTTGAACG  | 400 |                   |   |  |
| HAU A01_116027001-116028131 +  | GGTAATAATATCTTATACACACTCGTTTGAACG  | 400 |                   |   |  |
| HAU D01_61617884-61619012 +    | GGTAATAATATCTTATACACACTCGTTTGAACG  | 400 |                   |   |  |
| HAU D01_61609329-61610459 +    | GGTAATAATATCTTATACACACTCGTTTGAACG  | 400 |                   |   |  |
| NAU A01_98366726-98367857 +    | TCAACCCAGCAGTGACCTTTGGGCTTTTCTGGCT | 500 |                   |   |  |
| NAU A01_98361882-98363012 +    | TCAACCCAGCAGTGACCTTTGGGCTTTTCTGGCT | 500 |                   |   |  |
| NAU D01_59898611-59899741 +    | TCAACCCAGCAGTGACCTTTGGGCTTTTCTGGCT | 500 |                   |   |  |
| NAU D01_59890054-59891184 +    | TCAACCCAGCAGTGACCTTTGGGCTTTTCTGGCT | 500 |                   |   |  |
| ZJU A01_116473274-116474405 +  | TCAACCCAGCAGTGACCTTTGGGCTTTTCTGGCT | 500 |                   |   |  |
| ZJU A01_116468430-116469560 +  | TCAACCCAGCAGTGACCTTTGGGCTTTTCTGGCT | 500 |                   |   |  |
| ZJU D01_63074368-63075498 +    | TCAACCCAGCAGTGACCTTTGGGCTTTTCTGGCT | 500 |                   |   |  |
| ZJU scaffold_D01_84-385/46-787 | TCAACCCAGCAGTGACCTTTGGGCTTTTCTGGCT | 413 |                   |   |  |
| HAU A01_116031840-116032971 +  | TCAACCCAGCAGTGACCTTTGGGCTTTTCTGGCT | 500 |                   |   |  |
| HAU A01_116027001-116028131 +  | TCAACCCAGCAGTGACCTTTGGGCTTTTCTGGCT | 500 |                   |   |  |
| HAU D01_61617884-61619012 +    | TCAACCCAGCAGTGACCTTTGGGCTTTTCTGGCT | 500 |                   |   |  |
| HAU D01_61609329-61610459 +    | TCAACCCAGCAGTGACCTTTGGGCTTTTCTGGCT | 500 |                   |   |  |
| NAU A01_98366726-98367857 +    | GTGTGGGTTAGTCAAGGCTTCCAAAAGAGTATT  | 600 |                   |   |  |
| NAU A01_98361882-98363012 +    | GTGTGGGTTAGTCAAGGCTTCCAAAAGAGTATT  | 600 |                   |   |  |
| NAU D01_59898611-59899741 +    | GTGTGGGTTAGTCAAGGCTTCCAAAAGAGTATT  | 600 |                   |   |  |
| NAU D01_59890054-59891184 +    | GTGTGGGTTAGTCAAGGCTTCCAAAAGAGTATT  | 600 |                   |   |  |
| ZJU A01_116473274-116474405 +  | GTGTGGGTTAGTCAAGGCTTCCAAAAGAGTATT  | 600 |                   |   |  |
| ZJU A01_116468430-116469560 +  | GTGTGGGTTAGTCAAGGCTTCCAAAAGAGTATT  | 600 |                   |   |  |
| ZJU D01_63074368-63075498 +    | GTGTGGGTTAGTCAAGGCTTCCAAAAGAGTATT  | 600 |                   |   |  |
| ZJU scaffold_D01_84-385/46-787 | GTGTGGGTTAGTCAAGGCTTCCAAAAGAGTATT  | 513 |                   |   |  |
| HAU A01_116031840-116032971 +  | GTGTGGGTTAGTCAAGGCTTCCAAAAGAGTATT  | 600 |                   |   |  |
| HAU A01_116027001-116028131 +  | GTGTGGGTTAGTCAAGGCTTCCAAAAGAGTATT  | 600 |                   |   |  |
| HAU D01_61617884-61619012 +    | GTGTGGGTTAGTCAAGGCTTCCAAAAGAGTATT  | 600 |                   |   |  |
| HAU D01_61609329-61610459 +    | GTGTGGGTTAGTCAAGGCTTCCAAAAGAGTATT  | 600 |                   |   |  |
| NAU A01_98366726-98367857 +    | GCTGAAATATAGGCAGTTTGTGCTTGTACACTGT | 700 |                   |   |  |
| NAU A01_98361882-98363012 +    | GCTGAAATATAGGCAGTTTGTGCTTGTACACTGT | 700 |                   |   |  |

NAU|D01\_59898611-59899741|+|GCTGAAATAT|GGCACATTTGCTGCTGTTACACTGTTTCTGCAACTGATCCCAAAGAAACGCAAGAGATTCTCATGTTCTGTATGTCCTTAA|700  
NAU|D01\_59890054-59891184|+|GCTGAAATAT|GGCACATTTGCTGCTGTTACACTGTTTCTGCAACTGATCCCAAAGAAACGCAAGAGATTCTCATGTTCTGTATGTCCTTAA|700  
ZJU|A01\_116473274-116474405|+|GCTGAAATAT|AGGCAGTTTGGCAGTTTACACTGTTTCTGCAACTGATCCCAAAGAAACGCAAGAGATTCTCATGTTCTGTATGTCCTTAA|700  
ZJU|A01\_116468430-116469560|+|GCTGAAATAT|GGCACATTTGCTGCTGTTACACTGTTTCTGCAACTGATCCCAAAGAAACGCAAGAGATTCTCATGTTCTGTATGTCCTTAA|700  
ZJU|D01\_63074368-63075498|+|GCTGAAATAT|GGCACATTTGCTGCTGTTACACTGTTTCTGCAACTGATCCCAAAGAAACGCAAGAGATTCTCATGTTCTGTATGTCCTTAA|700  
ZJU|scaffold\_D01\_84-385/46-787|GCTGAAATAT|GGCACATTTGCTGCTGTTACACTGTTTCTGCAACTGATCCCAAAGAAACGCAAGAGATTCTCATGTTCTGTATGTCCTTAA|613  
HAU|A01\_116031840-116032971|+|GCTGAAATAT|AGGCAGTTTGGCAGTTTACACTGTTTCTGCAACTGATCCCAAAGAAACGCAAGAGATTCTCATGTTCTGTATGTCCTTAA|700  
HAU|A01\_116027001-116028131|+|GCTGAAATAT|GGCACATTTGCTGCTGTTACACTGTTTCTGCAACTGATCCCAAAGAAACGCAAGAGATTCTCATGTTCTGTATGTCCTTAA|700  
HAU|D01\_61617884-61619012|+|GCTGAAATAT|GGCACATTTGCTGCTGTTACACTGTTTCTGCAACTGATCCCAAAGAAACGCAAGAGATTCTCATGTTCTGTATGTCCTTAA|700  
HAU|D01\_61609329-61610459|+|GCTGAAATAT|GGCACATTTGCTGCTGTTACACTGTTTCTGCAACTGATCCCAAAGAAACGCAAGAGATTCTCATGTTCTGTATGTCCTTAA|700

NAU|A01\_98366726-98367857|+|TTCAATCCAACACACACACAAGTTCATTGACAAGTATGTTTTAGGTTCTAATTTTTCTACATTTTGAAGGTGTTGGCACCCTCCATTGGGTTT|800  
NAU|A01\_98361882-98363012|+|TTCAATCCAACACACACACAAGTTCATTGACAAGTATGTTTTAGGTTCTAATTTTTCTACATTTTGAAGGTGTTGGCACCCTCCATTGGGTTT|800  
NAU|D01\_59898611-59899741|+|TTCAATCCAACACACACACAAGTTCATTGACAAGTATGTTTTAGGTTCTAATTTTTCTACATTTTGAAGGTGTTGGCACCCTCCATTGGGTTT|800  
NAU|D01\_59890054-59891184|+|TTCAATCCAACACACACACAAGTTCATTGACAAGTATGTTTTAGGTTCTAATTTTTCTACATTTTGAAGGTGTTGGCACCCTCCATTGGGTTT|800  
ZJU|A01\_116473274-116474405|+|TTCAATCCAACACACACACAAGTTCATTGACAAGTATGTTTTAGGTTCTAATTTTTCTACATTTTGAAGGTGTTGGCACCCTCCATTGGGTTT|800  
ZJU|A01\_116468430-116469560|+|TTCAATCCAACACACACACAAGTTCATTGACAAGTATGTTTTAGGTTCTAATTTTTCTACATTTTGAAGGTGTTGGCACCCTCCATTGGGTTT|800  
ZJU|D01\_63074368-63075498|+|TTCAATCCAACACACACACAAGTTCATTGACAAGTATGTTTTAGGTTCTAATTTTTCTACATTTTGAAGGTGTTGGCACCCTCCATTGGGTTT|800  
ZJU|scaffold\_D01\_84-385/46-787|TTCAATCCAACACACACACAAGTTCATTGACAAGTATGTTTTAGGTTCTAATTTTTCTACATTTTGAAGGTGTTGGCACCCTCCATTGGGTTT|713  
HAU|A01\_116027001-116028131|+|TTCAATCCAACACACACACAAGTTCATTGACAAGTATGTTTTAGGTTCTAATTTTTCTACATTTTGAAGGTGTTGGCACCCTCCATTGGGTTT|800  
HAU|D01\_61617884-61619012|+|TTCAATCCAACACACACACAAGTTCATTGACAAGTATGTTTTAGGTTCTAATTTTTCTACATTTTGAAGGTGTTGGCACCCTCCATTGGGTTT|799  
HAU|D01\_61609329-61610459|+|TTCAATCCAACACACACACAAGTTCATTGACAAGTATGTTTTAGGTTCTAATTTTTCTACATTTTGAAGGTGTTGGCACCCTCCATTGGGTTT|800

NAU|A01\_98366726-98367857|+|CTGTGTTTATGGTTCATTTGGCAACTATCCGATCACCAGGAAACCGAATCAACCTGCTCGTAGTTTCGGAGCTG|900  
NAU|A01\_98361882-98363012|+|CTGTGTTTATGGTTCATTTGGCAACTATCCGATCACCAGGAAACCGAATCAACCTGCTCGTAGTTTCGGAGCTG|900  
NAU|D01\_59898611-59899741|+|CTGTGTTTATGGTTCATTTGGCAACTATCCGATCACCAGGAAACCGAATCAACCTGCTCGTAGTTTCGGAGCTG|900  
NAU|D01\_59890054-59891184|+|CTGTGTTTATGGTTCATTTGGCAACTATCCGATCACCAGGAAACCGAATCAACCTGCTCGTAGTTTCGGAGCTG|900  
ZJU|A01\_116473274-116474405|+|CTGTGTTTATGGTTCATTTGGCAACTATCCGATCACCAGGAAACCGAATCAACCTGCTCGTAGTTTCGGAGCTG|900  
ZJU|A01\_116468430-116469560|+|CTGTGTTTATGGTTCATTTGGCAACTATCCGATCACCAGGAAACCGAATCAACCTGCTCGTAGTTTCGGAGCTG|900  
ZJU|D01\_63074368-63075498|+|CTGTGTTTATGGTTCATTTGGCAACTATCCGATCACCAGGAAACCGAATCAACCTGCTCGTAGTTTCGGAGCTG|900  
ZJU|scaffold\_D01\_84-385/46-787|CTGTGTTTATGGTTCATTTGGCAACTATCCGATCACCAGGAAACCGAATCAACCTGCTCGTAGTTTCGGAGCTG|813  
HAU|A01\_116031840-116032971|+|CTGTGTTTATGGTTCATTTGGCAACTATCCGATCACCAGGAAACCGAATCAACCTGCTCGTAGTTTCGGAGCTG|900  
HAU|A01\_116027001-116028131|+|CTGTGTTTATGGTTCATTTGGCAACTATCCGATCACCAGGAAACCGAATCAACCTGCTCGTAGTTTCGGAGCTG|900  
HAU|D01\_61617884-61619012|+|CTGTGTTTATGGTTCATTTGGCAACTATCCGATCACCAGGAAACCGAATCAACCTGCTCGTAGTTTCGGAGCTG|898  
HAU|D01\_61609329-61610459|+|CTGTGTTTATGGTTCATTTGGCAACTATCCGATCACCAGGAAACCGAATCAACCTGCTCGTAGTTTCGGAGCTG|900

NAU|A01\_98366726-98367857|+|ATGGGATGACATGATGAACCTTCATTATACAATGATTTCTATT|1000  
NAU|A01\_98361882-98363012|+|ATGGGATGACATGATGAACCTTCATTATACAATGATTTCTATT|999  
NAU|D01\_59898611-59899741|+|ATGGGATGACATGATGAACCTTCATTATACAATGATTTCTATT|999  
NAU|D01\_59890054-59891184|+|ATGGGATGACATGATGAACCTTCATTATACAATGATTTCTATT|999  
ZJU|A01\_116473274-116474405|+|ATGGGATGACATGATGAACCTTCATTATACAATGATTTCTATT|1000  
ZJU|A01\_116468430-116469560|+|ATGGGATGACATGATGAACCTTCATTATACAATGATTTCTATT|999  
ZJU|D01\_63074368-63075498|+|ATGGGATGACATGATGAACCTTCATTATACAATGATTTCTATT|999  
ZJU|scaffold\_D01\_84-385/46-787|ATGGGATGACATGATGAACCTTCATTATACAATGATTTCTATT|912  
HAU|A01\_116031840-116032971|+|ATGGGATGACATGATGAACCTTCATTATACAATGATTTCTATT|1000  
HAU|A01\_116027001-116028131|+|ATGGGATGACATGATGAACCTTCATTATACAATGATTTCTATT|999  
HAU|D01\_61617884-61619012|+|ATGGGATGACATGATGAACCTTCATTATACAATGATTTCTATT|997  
HAU|D01\_61609329-61610459|+|ATGGGATGACATGATGAACCTTCATTATACAATGATTTCTATT|999

NAU|A01\_98366726-98367857|+|GGAATATTGCAGTGGATATTTCTGGTGGACCATTCATTGGAGTGCCATTGCTGCAATTTATCACCAGTATATCCTCAGAGCAGGAGCTGCTAAAGCTC|1100  
NAU|A01\_98361882-98363012|+|GGAATATTGCAGTGGATATTTCTGGTGGACCATTCATTGGAGTGCCATTGCTGCAATTTATCACCAGTATATCCTCAGAGCAGGAGCTGCTAAAGCTC|1099  
NAU|D01\_59898611-59899741|+|GGAATATTGCAGTGGATATTTCTGGTGGACCATTCATTGGAGTGCCATTGCTGCAATTTATCACCAGTATATCCTCAGAGCAGGAGCTGCTAAAGCTC|1099  
NAU|D01\_59890054-59891184|+|GGAATATTGCAGTGGATATTTCTGGTGGACCATTCATTGGAGTGCCATTGCTGCAATTTATCACCAGTATATCCTCAGAGCAGGAGCTGCTAAAGCTC|1099  
ZJU|A01\_116473274-116474405|+|GGAATATTGCAGTGGATATTTCTGGTGGACCATTCATTGGAGTGCCATTGCTGCAATTTATCACCAGTATATCCTCAGAGCAGGAGCTGCTAAAGCTC|1100  
ZJU|A01\_116468430-116469560|+|GGAATATTGCAGTGGATATTTCTGGTGGACCATTCATTGGAGTGCCATTGCTGCAATTTATCACCAGTATATCCTCAGAGCAGGAGCTGCTAAAGCTC|1099  
ZJU|D01\_63074368-63075498|+|GGAATATTGCAGTGGATATTTCTGGTGGACCATTCATTGGAGTGCCATTGCTGCAATTTATCACCAGTATATCCTCAGAGCAGGAGCTGCTAAAGCTC|1099  
ZJU|scaffold\_D01\_84-385/46-787|GGAATATTGCAGTGGATATTTCTGGTGGACCATTCATTGGAGTGCCATTGCTGCAATTTATCACCAGTATATCCTCAGAGCAGGAGCTGCTAAAGCTC|1012  
HAU|A01\_116031840-116032971|+|GGAATATTGCAGTGGATATTTCTGGTGGACCATTCATTGGAGTGCCATTGCTGCAATTTATCACCAGTATATCCTCAGAGCAGGAGCTGCTAAAGCTC|1100  
HAU|A01\_116027001-116028131|+|GGAATATTGCAGTGGATATTTCTGGTGGACCATTCATTGGAGTGCCATTGCTGCAATTTATCACCAGTATATCCTCAGAGCAGGAGCTGCTAAAGCTC|1099  
HAU|D01\_61617884-61619012|+|GGAATATTGCAGTGGATATTTCTGGTGGACCATTCATTGGAGTGCCATTGCTGCAATTTATCACCAGTATATCCTCAGAGCAGGAGCTGCTAAAGCTC|1097  
HAU|D01\_61609329-61610459|+|GGAATATTGCAGTGGATATTTCTGGTGGACCATTCATTGGAGTGCCATTGCTGCAATTTATCACCAGTATATCCTCAGAGCAGGAGCTGCTAAAGCTC|1099

NAU|A01\_98366726-98367857|+|TTGGATCCTTCAGAAGCAGCTCAGCCATGTA|1132  
NAU|A01\_98361882-98363012|+|TTGGATCCTTCAGAAGCAGCTCAGCCATGTA|1131  
NAU|D01\_59898611-59899741|+|TTGGATCCTTCAGAAGCAGCTCAGCCATGTA|1131  
NAU|D01\_59890054-59891184|+|TTGGATCCTTCAGAAGCAGCTCAGCCATGTA|1131  
ZJU|A01\_116473274-116474405|+|TTGGATCCTTCAGAAGCAGCTCAGCCATGTA|1132  
ZJU|A01\_116468430-116469560|+|TTGGATCCTTCAGAAGCAGCTCAGCCATGTA|1131  
ZJU|D01\_63074368-63075498|+|TTGGATCCTTCAGAAGCAGCTCAGCCATGTA|1131  
ZJU|scaffold\_D01\_84-385/46-787|TTGGATCCTTCAGAAGCAGCTCAGCCATGTA|1044  
HAU|A01\_116031840-116032971|+|TTGGATCCTTCAGAAGCAGCTCAGCCATGTA|1132  
HAU|A01\_116027001-116028131|+|TTGGATCCTTCAGAAGCAGCTCAGCCATGTA|1131  
HAU|D01\_61617884-61619012|+|TTGGATCCTTCAGAAGCAGCTCAGCCATGTA|1129  
HAU|D01\_61609329-61610459|+|TTGGATCCTTCAGAAGCAGCTCAGCCATGTA|1131
