# Supplementary material for: Combining genome-wide and transcriptome-wide analyses reveal the evolutionary conservation and functional diversity of aquaporins in cotton
Source: BMC Genomics. 2019 Jul 1;20:538. doi: 10.1186/s12864-019-5928-2 (PMC6604486; doi:10.1186/s12864-019-5928-2)
Supplement: Supplementary file 1 — Table S1. Characterization of AQP family genes identified in Gossypium. (XLSX 24 kb) [file 12864_2019_5928_MOESM1_ESM.xlsx]

## Sheet: Sheet1
Additional file 1: Table S1. Characterization of AQP family genes identified in Gossypium.
Gene name	Chr	Lengh (AA)	pI	MW (Da)	Gravy	G. hirsutum (NAU)	G. hirsutum (ZJU)	G. hirsutum (HAU)	Gene name	G.arboreum/G.raimondii	Gene name	G. barbadense (Hai7124)	G. barbadense (3-79)
GhNIP1;1_At	A05	292	6.71	31553.9	0.047	Gh_A05G1940	GH_A05G2263	-	GaNIP1;1	Ga05G2402	GbNIP1;1_At	GB_A05G2292	-
GhNIP1;1_Dt	D05	365	6.36	39129.9	0.226	Gh_D05G2171	GH_D05G2285	-	GrNIP1;1	Gorai.009G236600.1	GbNIP1;1_Dt	GB_D05G2304	-
GhNIP1;2a_At	A06	275	8.76	29208.9	0.263	Gh_A06G1128	GH_A06G1420	Ghir_A06G013390.2	GaNIP1;2a	Ga11G1349	GbNIP1;2a_At	GB_A06G1535	Gbar_A06G014030.1
GhNIP1;2a_Dt	D06	275	8.76	29226.8	0.265	Gh_D06G1464	GH_D06G1578	Ghir_D06G015180.1	GrNIP1;2a	Gorai.010G162400.1	GbNIP1;2a_Dt	GB_D06G1630	Gbar_D06G015080.1
GhNIP1;2b_At	A06	270	6.04	28960.5	0.286	Gh_A06G1993	GH_A06G2263	Ghir_A06G021300.1	GaNIP1;2b	Ga06G2445	GbNIP1;2b_At	GB_A06G2296	Gbar_A06G021300.1
GhNIP1;2b_Dt	D06	270	5.82	28984.4	0.296	Gh_D06G2131	GH_D06G2302	Ghir_D06G022370.1	GrNIP1;2b	Gorai.010G240400.1	GbNIP1;2b_Dt	GB_D06G2396	Gbar_D06G022060.1
GhNIP1;2c_At	A10	280	8.98	29678.4	0.324	Gh_A10G0307	GH_A10G0350	Ghir_A10G003030.1	GaNIP1;2c	Ga10G2732	GbNIP1;2c_At	GB_A10G0344	Gbar_A10G003630.1
GhNIP1;2c_Dt	D10	280	8.97	29620.5	0.326	Gh_D10G0313	GH_D10G0364	Ghir_D10G003840.1	GrNIP1;2c	Gorai.011G035800.1	GbNIP1;2c_Dt	GB_D10G0347	Gbar_D10G003500.1
GhNIP4;1_At	A03	269	7.64	28892.2	0.344	Gh_A03G1055	GH_A03G1428	Ghir_A03G013730.1	GaNIP4;1	Ga03G1630	GbNIP4;1_At	GB_A03G1502	Gbar_A03G013950.1
GhNIP4;1_Dt	D02	269	8.9	29032.5	0.344	Gh_D02G1465	GH_D02G1581	Ghir_D02G014920.1	GrNIP4;1	Gorai.005G161900.1	GbNIP4;1_Dt	GB_D02G1640	Gbar_D02G015520.1
GhNIP4;2_At	A11	268	9.03	28289.7	0.364	Gh_A11G3043	GH_A11G0713	Ghir_A11G007580.1	GaNIP4;2	Ga11G3352	GbNIP4;2_At	GB_A11G0729	Gbar_A11G007200.1
GhNIP4;2_Dt	D11	268	9.01	28301.7	0.367	Gh_D11G0733	GH_D11G0746	-	GrNIP4;2	Gorai.007G078800.1	GbNIP4;2_Dt	GB_D11G0750	Gbar_D11G007580.2
GhNIP5;1_At	A08	298	8.57	31146	0.367	Gh_A08G0940	GH_A08G1308	Ghir_A08G011770.1	GaNIP5;1	Ga08G1251	GbNIP5;1_At	GB_A08G1379	Gbar_A08G012140.1
GhNIP5;1_Dt	D08	298	8.57	31116	0.367	Gh_D08G1149	GH_D08G1238	Ghir_D08G011620.1	GrNIP5;1	Gorai.004G126900.1	GbNIP5;1_Dt	GB_D08G1297	Gbar_D08G012110.1
GhNIP6;1_At	A05	183	9.51	19006.4	0.367	Gh_A05G1025	GH_A05G1209	Ghir_A05G012370.1	GaNIP6;1	Ga05G1268	GbNIP6;1_At	GB_A05G1222	Gbar_A05G011740.2
GhNIP6;1_Dt	D05	300	8.99	30974.1	0.368	Gh_D05G1142	GH_D05G1211	Ghir_D05G012070.1	GrNIP6;1	Gorai.009G124500.1	GbNIP6;1_Dt	GB_D05G1210	Gbar_D05G012160.1
GhNIP7;1a_At	A09	209	9.82	21908.1	0.371	Gh_A09G0535	GH_A09G0737	Ghir_A09G006340.1	GaNIP7;1a	Ga09G0766	GbNIP7;1a_At	GB_A09G0838	Gbar_A09G006490.1
GhNIP7;1a_Dt	D09	209	9.82	21914.1	0.379	Gh_D09G0532	GH_D09G0677	Ghir_D09G005980.1	GrNIP7;1a	Gorai.006G052300.1	GbNIP7;1a_Dt	GB_D09G0688	Gbar_D09G006140.1
GhNIP7;1b_At	A09	192	6.02	20179.4	0.381	Gh_A09G2266	GH_A09G2341	Ghir_A09G022770.1	GaNIP7;1b	Ga09G2454	GbNIP7;1b_At	GB_A09G2442	Gbar_A09G022880.1
GhNIP7;1b_Dt	D09	266	5.46	27793.5	0.386	Gh_D09G2063	GH_D09G2279	Ghir_D09G022010.1	GrNIP7;1b	Gorai.006G236300.1	GbNIP7;1b_Dt	GB_D09G2288	Gbar_D09G022590.1
GhPIP1;4a_At	A03	287	8.6	30852.8	0.393	Gh_A03G0138	GH_A03G0269	Ghir_A03G002480.1	GaPIP1;4a	Ga01G2570	GbPIP1;4a_At	GB_A03G0263	Gbar_A03G002480.1
GhPIP1;4a_Dt	D03	287	8.6	30852.8	0.4	Gh_D03G1443	GH_D03G1698	Ghir_D03G016460.1	GrPIP1;4a	Gorai.003G158100.1	GbPIP1;4a_Dt	GB_D03G1732	Gbar_D03G015950.1
GhPIP1;4b_At	A08	546	8.8	59582.1	0.401	Gh_A08G1640	GH_A08G2092	Ghir_A08G019140.1	GaPIP1;4b	Ga08G2153	GbPIP1;4b_At	GB_A08G2199	Gbar_A08G019690.1
GhPIP1;4b_Dt	D08	287	8.6	30920.8	0.401	Gh_D08G1970	GH_D08G2109	Ghir_D08G020060.1	GrPIP1;4b	Gorai.004G212800.1	GbPIP1;4b_Dt	GB_D08G2187	Gbar_D08G020630.1
GhPIP1;4c_At	A09	287	9.23	30787.7	0.402	Gh_A09G1529	GH_A09G1802	Ghir_A09G017290.1	GaPIP1;4c	Ga09G1963	GbPIP1;4c_At	GB_A09G1921	Gbar_A09G017550.1
GhPIP1;4c_Dt	D09	287	9.23	30767.7	0.404	Gh_D09G1547	GH_D09G1752	Ghir_D09G016720.1	GrPIP1;4c	Gorai.006G181300.1	GbPIP1;4c_Dt	GB_D09G1766	Gbar_D09G017230.1
GhPIP1;4d_At	A11	215	9.73	22695.6	0.406	Gh_A11G0803	GH_A11G0930	Ghir_A11G009630.1	GaPIP1;4d	Ga11G3124	GbPIP1;4d_At	GB_A11G0938	Gbar_A11G009240.1
GhPIP1;4d_Dt	D11	287	8.98	30804.8	0.406	Gh_D11G0941	GH_D11G0957	Ghir_D11G009600.1	GrPIP1;4d	Gorai.007G100000.1	GbPIP1;4d_Dt	GB_D11G0970	Gbar_D11G009820.1
GhPIP1;4e_At	A11	287	9.1	30969.9	0.408	Gh_A11G2938	GH_A11G3747	Ghir_A11G035510.1	GaPIP1;4e	Ga11G0022	GbPIP1;4e_At	GB_A11G3825	Gbar_A11G034920.1
GhPIP1;4e_Dt	D11	281	8.96	30297	0.411	Gh_D11G3324	GH_D11G3773	Ghir_D11G036370.1	GrPIP1;4e	Gorai.007G378400.1	GbPIP1;4e_Dt	GB_D11G3843	Gbar_D11G035880.1
GhPIP1;4f_At	A06	289	8.81	30867	0.416	Gh_A06G1450	GH_A06G1894	Ghir_A06G017660.1	GaPIP1;4f	Ga06G2010	GbPIP1;4f_At	GB_A06G1934	Gbar_A06G017740.1
GhPIP1;4f_Dt	D06	289	8.81	30867	0.417	Gh_D06G2371	GH_D06G1923	Ghir_D06G018590.1	GrPIP1;4f	Gorai.010G198800.1	GbPIP1;4f_Dt	GB_D06G2002	Gbar_D06G018400.1
GhPIP1;4g_At	A13	289	8.63	31055.1	0.418	Gh_A13G0156	GH_A13G0171	Ghir_A13G001560.1	GaPIP1;4g	Ga13G0191	GbPIP1;4g_At	GB_A13G0175	Gbar_A13G001790.1
GhPIP1;4g_Dt	D13	289	9.21	31089.2	0.42	Gh_D13G0175	GH_D13G0177	Ghir_D13G001860.1	GrPIP1;4g	Gorai.013G019300.1	GbPIP1;4g_Dt	GB_D13G0171	Gbar_D13G001650.1
GhPIP1;4h_At	A10	288	8.96	30780.8	0.386	Gh_A10G2089	GH_A10G2583	Ghir_A10G023690.1	GaPIP1;4h	Ga10G0006	GbPIP1;4h_At	GB_A10G2740	Gbar_A10G024850.1
GhPIP1;4h_Dt	D10	288	8.81	30762.7	0.386	Gh_D10G2359	GH_D10G2686	Ghir_D10G026150.1	GrPIP1;4h	Gorai.011G283200.1	GbPIP1;4h_Dt	GB_D10G2701	Gbar_D10G025910.1
GhPIP1;4i_At	A10	288	8.96	30780.8	0.392	Gh_A10G2090	GH_A10G2584	Ghir_A10G023700.1	GaPIP1;4i	Ga10G0007	GbPIP1;4i_At	GB_A10G2741	Gbar_A10G024860.1
GhPIP1;4i_Dt	D10	288	8.96	30766.7	0.393	Gh_D10G2360	GH_D10G2687	Ghir_D10G026160.1	GrPIP1;4i	Gorai.011G283300.1	GbPIP1;4i_Dt	GB_D10G2702	Gbar_D10G025920.1
GhPIP1;4j_At	A10	288	8.97	30764.8	0.422	Gh_A10G2091	-	-	-	-	-	-	-
GhPIP1;4j_Dt	D10	288	8.97	30798.8	0.424	Gh_D10G2361	GH_D10G2688	Ghir_D10G026170.1	GrPIP1;4j	Gorai.011G283400.1	GbPIP1;4j_Dt	GB_D10G2703	-
GhPIP2;1_At	A09	285	6.99	30477.3	0.427	Gh_A09G1405	GH_A09G1670	Ghir_A09G015880.1	GaPIP2;1	Ga09G1708	GbPIP2;1_At	GB_A09G1795	Gbar_A09G016090.1
GhPIP2;1_Dt	D09	285	6.99	30489.3	0.43	Gh_D09G1409	GH_D09G1616	Ghir_D09G015320.1	GrPIP2;1	Gorai.006G166800.1	GbPIP2;1_Dt	GB_D09G1633	Gbar_D09G015800.1
GhPIP2;2a_At	A01	285	6.99	30407.2	0.447	Gh_A01G1843	GH_A01G2320	Ghir_A01G020720.1	GaPIP2;2a	Ga02G1659	GbPIP2;2a_At	GB_A01G2425	Gbar_A01G021210.1
GhPIP2;2a_Dt	D01	237	8.78	24924.9	0.448	Gh_D01G2085	-	Ghir_D01G022260.1	GrPIP2;2a	Gorai.002G248400.1	GbPIP2;2a_At	GB_A01G2426	Gbar_D01G022280.1
GhPIP2;2b_At	A08	282	7.63	30338.3	0.458	Gh_A08G1761	GH_A08G2252	Ghir_A08G020720.1	GaPIP2;2b	Ga08G2320	GbPIP2;2b_At	GB_A08G2361	Gbar_A08G021320.1
GhPIP2;2b_Dt	D08	282	7.63	30364.2	0.46	Gh_D08G2105	GH_D08G2257	Ghir_D08G021520.1	GrPIP2;2b	Gorai.004G229000.1	GbPIP2;2b_Dt	GB_D08G2348	Gbar_D08G022090.1
GhPIP2;2c_At	A04	285	6.99	30292.1	0.46	Gh_A04G0629	GH_A04G0928	Ghir_A04G008250.1	GaPIP2;2c	Ga04G0829	GbPIP2;2c_At	GB_A04G0967	Gbar_A04G007830.1
GhPIP2;2c_Dt	D04	285	6.99	30290.1	0.467	Gh_D04G1090	GH_D04G1262	Ghir_D04G012300.1	GrPIP2;2c	Gorai.009G418100.1	GbPIP2;2c_Dt	GB_D04G1335	Gbar_D04G012310.1
GhPIP2;2d_At	A08	285	8.2	30623.5	0.472	Gh_A08G2559	GH_A08G0010	Ghir_A08G000120.1	GaPIP2;2d	Ga08G0016	GbPIP2;2d_At	GB_A08G0008	Gbar_A08G000100.1
GhPIP2;2d_Dt	D08	285	8.2	30581.4	0.484	Gh_D08G0007	GH_D08G0013	Ghir_D08G000170.1	GrPIP2;2d	Gorai.004G001400.1	GbPIP2;2d_Dt	GB_D08G0009	Gbar_D08G000110.1
GhPIP2;2e_At	A01	285	6.99	30363.1	0.457	Gh_A01G1844	GH_A01G2321	-	-	-	-	-	-
GhPIP2;2e_Dt	D01	285	6.57	30451.2	0.458	Gh_D01G2086	GH_D01G2400	Ghir_D01G022270.1	-	-	GbPIP2;2e_Dt	GB_D01G2499	-
GhPIP2;4a_At	A03	328	6.78	35403	0.485	Gh_A03G0281	GH_A03G0443	Ghir_A03G004100.1	GaPIP2;4a	Ga01G2379	GbPIP2;4a_At	GB_A03G0428	Gbar_A03G004070.1
GhPIP2;4a_Dt	D03	291	6.41	31173.1	0.494	Gh_D03G1822	GH_D03G1534	Ghir_D03G014820.1	GrPIP2;4a	Gorai.003G141600.1	GbPIP2;4a_Dt	GB_D03G1563	Gbar_D03G014300.1
GhPIP2;4b_Dt	D12	161	6.4	17436.8	0.512	Gh_D12G1974	GH_D12G2204	-	GrPIP2;4b	Gorai.008G216300.1	GbPIP2;4b_Dt	GB_D12G2276	Gbar_D12G021130.1
GhPIP2;4c_At	A05	289	8.2	31020.9	0.5	Gh_A05G0889	GH_A05G1039	Ghir_A05G010560.1	GaPIP2;4c	Ga05G1091	GbPIP2;4c_At	GB_A05G1051	Gbar_A05G010020.1
GhPIP2;4c_Dt	D05	289	7.64	31014	0.515	Gh_D05G0972	GH_D05G1028	Ghir_D05G010270.1	GrPIP2;4c	Gorai.009G107200.1	GbPIP2;4c_Dt	GB_D05G1025	Gbar_D05G010490.2
GhPIP2;4d_Dt	D13	170	6.4	18327.2	0.518	Gh_D13G1155	GH_D13G1238	Ghir_D13G012170.1	GrPIP2;4d	Gorai.013G127300.1	GbPIP2;4d_Dt	GB_D13G1327	Gbar_D13G012010.1
GhPIP2;5_At	A10	282	9.34	30023	0.522	Gh_A10G1843	GH_A10G2271	Ghir_A10G021000.1	GaPIP2;5a	Ga10G0547	GbPIP2;5a_At	GB_A10G2425	Gbar_A10G022140.2
GhPIP2;5_Dt	D10	282	9.34	29995.9	0.524	Gh_D10G2100	GH_D10G2360	Ghir_D10G022810.1	GrPIP2;5a	Gorai.011G239500.1	GbPIP2;5a_Dt	GB_D10G2380	Gbar_D10G023530.1
-	-	-	-	-	-	-	-	-	GrPIP2;5b	Gorai.011G253400.1	GbPIP2;5b_Dt	GB_D10G2480	-
GhPIP2;7a_At	A01	278	8.82	29558.5	0.54	Gh_A01G0019	GH_A01G0022	Ghir_A01G000230.1	GaPIP2;7a	Ga01G0023	GbPIP2;7a_At	GB_A01G0022	Gbar_A01G000070.1
GhPIP2;7a_Dt	D01	278	8.82	29581.5	0.54	Gh_D01G0018	GH_D01G0022	Ghir_D01G000240.1	GrPIP2;7a	Gorai.002G002500.1	GbPIP2;7a_Dt	GB_D01G0023	Gbar_D01G000190.1
GhPIP2;7b_At	A01	278	8.83	29618.4	0.55	Gh_A01G1406	GH_A01G1813	Ghir_A01G016180.1	GaPIP2;7b	Ga02G1129	GbPIP2;7b_At	GB_A01G1923	Gbar_A01G016610.2
GhPIP2;7b_Dt	D01	278	8.99	29680.5	0.551	Gh_D01G1648	GH_D01G1929	Ghir_D01G017710.1	GrPIP2;7b	Gorai.002G198900.1	GbPIP2;7b_Dt	GB_D01G2019	Gbar_D01G017810.1
GhPIP2;7c_At	A11	272	8.94	28835.6	0.552	Gh_A11G1588	GH_A11G1804	Ghir_A11G018230.1	GaPIP2;7c	Ga11G2179	GbPIP2;7c_At	GB_A11G1807	Gbar_A11G017770.1
GhPIP2;7c_Dt	D11	272	9.13	28860.7	0.575	Gh_D11G1746	GH_D11G1840	Ghir_D11G018320.1	GrPIP2;7c	Gorai.007G191600.1	GbPIP2;7c_Dt	GB_D11G1859	Gbar_D11G018700.1
GhPIP2;7d_At	A10	280	9.36	29877.8	0.609	Gh_A10G0888	GH_A10G0989	Ghir_A10G009730.1	GaPIP2;7d	Ga10G1988	GbPIP2;7d_At	GB_A10G1027	Gbar_A10G010560.2
GhPIP2;7d_Dt	D10	281	9.33	29997	0.639	Gh_D10G0861	GH_D10G0967	Ghir_D10G009470.1	GrPIP2;7d	Gorai.011G098100.1	GbPIP2;7d_Dt	GB_D10G0953	Gbar_D10G009230.1
GhPIP2;8_At	A03	278	9	29723.6	0.644	Gh_A03G1815	GH_A03G2291	Ghir_A03G022300.1	GaPIP2;8	Ga03G2644	GbPIP2;8_At	GB_A03G2378	Gbar_A03G022410.1
GhPIP2;8_Dt	D02	278	9	29742.6	0.653	Gh_D02G2248	GH_D02G2461	Ghir_D02G023760.1	GrPIP2;8	Gorai.005G254400.1	GbPIP2;8_Dt	GB_D02G2516	Gbar_D02G024300.1
-	-	-	-	-	-	-	-	-	-	-	GbSIP1;1a_At	GB_A10G2796	-
GhSIP1;1a_Dt	D05	241	9.71	26245.2	0.686	Gh_D05G2080	GH_D05G2199	Ghir_D05G022080.1	GrSIP1;1a	Gorai.009G226500.1	-	-	Gbar_D05G022080.1
GhSIP1;1b_At	A07	241	9.81	26238.2	0.657	Gh_A07G2010	GH_A07G2482	Ghir_A07G023590.1	GaSIP1;1b	Ga07G2544	GbSIP1;1b_At	GB_A07G2565	Gbar_A07G023270.1
GhSIP1;1b_Dt	D04	241	9.68	26003.9	0.697	Gh_D04G0138	GH_D04G0170	Ghir_D04G001670.1	GrSIP1;1b	Gorai.012G017700.1	GbSIP1;1b_Dt	GB_D04G0165	Gbar_D04G001590.1
GhSIP1;1c_At	A13	240	8.87	25962.6	0.707	Gh_A13G1436	GH_A13G1928	Ghir_A13G017570.1	GaSIP1;1c	Ga13G2068	GbSIP1;1c_At	GB_A13G2055	Gbar_A13G018130.1
GhSIP1;1c_Dt	D13	238	6.49	25904.4	0.707	Gh_D13G1761	GH_D13G1887	Ghir_D13G018280.1	GrSIP1;1c	Gorai.013G191500.1	GbSIP1;1c_Dt	GB_D13G1990	Gbar_D13G018160.1
GhSIP1;1d_At	A10	243	10.1	25909.8	0.708	Gh_A10G1656	GH_A10G2019	Ghir_A10G018950.1	GaSIP1;1d	Ga10G0848	GbSIP1;1d_At	GB_A10G2147	Gbar_A10G019840.1
GhSIP1;1d_Dt	D10	243	10.15	25980.9	0.71	Gh_D10G1912	GH_D10G2122	Ghir_D10G020470.1	GrSIP1;1d	Gorai.011G214600.1	GbSIP1;1d_Dt	GB_D10G2131	Gbar_D10G019990.1
GhSIP1;2_At	A11	247	9.63	26796.8	0.71	Gh_A11G2172	GH_A11G2695	Ghir_A11G026170.1	GaSIP1;2	Ga11G1233	GbSIP1;2_At	GB_A11G2763	Gbar_A11G025540.1
GhSIP1;2_Dt	D11	247	9.63	26905.9	0.713	Gh_D11G2472	GH_D11G2718	Ghir_D11G026300.1	GrSIP1;2	Gorai.007G268300.1	GbSIP1;2_Dt	GB_D11G2747	Gbar_D11G026460.1
GhSIP2;1_At	A04	236	9.68	25566.3	0.718	Gh_A04G0089	GH_A04G0097	Ghir_A04G001020.1	GaSIP2;1	Ga05G4144	GbSIP2;1_At	GB_A04G0096	Gbar_A04G000870.1
GhSIP2;1_Dt	D05	236	9.78	25695.5	0.721	Gh_D05G3636	GH_D05G3968	Ghir_D05G038420.1	GrSIP2;1	Gorai.009G445300.1	GbSIP2;1_Dt	GB_D05G4038	Gbar_D05G038970.1
GhTIP1;1a_At	A01	249	5.89	25512.5	0.728	Gh_A01G1820	GH_A01G2295	Ghir_A01G020490.1	GaTIP1;1a	Ga02G1634	GbTIP1;1a_At	GB_A01G2401	Gbar_A01G020990.1
GhTIP1;1a_Dt	D01	249	6.12	25509.5	0.741	Gh_D01G2058	GH_D01G2374	Ghir_D01G022000.1	GrTIP1;1a	Gorai.002G245900.1	GbTIP1;1a_Dt	GB_D01G2475	Gbar_D01G022110.1
GhTIP1;1b_At	A11	251	4.95	25891.9	0.751	Gh_A11G2882	GH_A11G3691	Ghir_A11G034930.1	GaTIP1;1b	Ga11G0084	GbTIP1;1b_At	GB_A11G3769	Gbar_A11G034330.2
GhTIP1;1b_Dt	D11	251	4.95	25905.9	0.751	Gh_D11G3268	GH_D11G3720	Ghir_D11G035770.1	GrTIP1;1b	Gorai.007G372700.1	GbTIP1;1b_Dt	GB_D11G3789	Gbar_D11G036450.1
GhTIP1;1c_At	A04	251	5.36	25748.8	0.755	Gh_A04G1393	GH_A04G0889	Ghir_A04G007820.1	GaTIP1;1c	Ga04G0887	GbTIP1;1c_At	GB_A04G0925	Gbar_A04G007460.1
GhTIP1;1c_Dt	D04	251	5.36	25748.8	0.759	Gh_D04G1049	GH_D04G1210	Ghir_D04G011880.1	GrTIP1;1c	Gorai.009G413000.1	GbTIP1;1c_Dt	GB_D04G1279	Gbar_D04G011860.1
GhTIP1;3a_At	A03	252	5.14	25836.8	0.761	Gh_A03G0325	GH_A03G0492	Ghir_A03G004590.1	GaTIP1;3a	Ga01G2333	GbTIP1;3a_At	GB_A03G0479	Gbar_A03G004590.1
GhTIP1;3a_Dt	D03	252	5.14	25836.8	0.765	Gh_D03G1253	GH_D03G1483	Ghir_D03G014300.1	GrTIP1;3a	Gorai.003G136600.1	GbTIP1;3a_Dt	GB_D03G1507	Gbar_D03G013770.1
GhTIP1;3b_At	A05	252	5.14	25972.9	0.765	Gh_A05G0834	GH_A05G0987	Ghir_A05G010000.1	GaTIP1;3b	Ga05G1034	GbTIP1;3b_At	GB_A05G0995	Gbar_A05G009460.1
GhTIP1;3b_Dt	D05	226	5.9	23429	0.765	Gh_D05G0956	GH_D05G0972	Ghir_D05G009730.1	GrTIP1;3b	Gorai.009G101700.1	GbTIP1;3b_Dt	GB_D05G0969	Gbar_D05G009930.1
GhTIP1;3c_At	A10	252	5.77	26190.3	0.766	Gh_A10G1912	GH_A10G2357	Ghir_A10G021750.1	GaTIP1;3c	Ga10G0412	GbTIP1;3c_At	GB_A10G2510	Gbar_A10G022910.1
GhTIP1;3c_Dt	D10	252	5.77	26069.1	0.767	Gh_D10G2205	GH_D10G2454	Ghir_D10G023820.1	GrTIP1;3c	Gorai.011G253100.1	GbTIP1;3c_Dt	GB_D10G2477	Gbar_D10G023500.1
GhTIP1;3d_At	A13	252	4.8	25818.8	0.776	Gh_A13G1995	GH_A13G2572	Ghir_A13G024190.1	GaTIP1;3d	Ga13G2780	GbTIP1;3d_At	GB_A13G2722	Gbar_A13G024410.1
GhTIP1;3d_Dt	D13	252	4.68	25842.8	0.777	Gh_D13G2394	GH_D13G2562	Ghir_D13G024930.1	GrTIP1;3d	Gorai.013G265400.1	GbTIP1;3d_Dt	GB_D13G2656	Gbar_D13G024960.1
GhTIP2;1_At	A02	248	5.31	25079.2	0.785	Gh_A02G1800	GH_A02G1415	Ghir_A02G013330.1	GaTIP2;1	Ga02G0652	GbTIP2;1_At	GB_A02G1433	Gbar_A02G013010.1
GhTIP2;1_Dt	D03	248	5.31	25049.1	0.804	Gh_D03G0583	GH_D03G0641	Ghir_D03G006170.1	GrTIP2;1	Gorai.003G064000.1	GbTIP2;1_Dt	GB_D03G0642	Gbar_D03G006010.1
GhTIP2;3a_At	A03	251	5.03	25162.3	0.817	Gh_A03G0083	GH_A03G0125	Ghir_A03G001340.1	GaTIP2;3a	Ga01G2805	GbTIP2;3a_At	GB_A03G0131	Gbar_A03G001330.1
GhTIP2;3a_Dt	D03	250	5.03	25002.1	0.84	Gh_D03G1568	GH_D03G1833	Ghir_D03G017730.1	GrTIP2;3a	Gorai.003G171800.1	GbTIP2;3a_Dt	GB_D03G1861	Gbar_D03G017200.2
GhTIP2;3b_At	A08	250	5.37	25102.2	0.843	Gh_A08G1523	GH_A08G1942	Ghir_A08G017680.1	GaTIP2;3b	Ga08G1979	GbTIP2;3b_At	GB_A08G2053	Gbar_A08G027830.1
GhTIP2;3b_Dt	D08	258	4.59	25749.8	0.864	Gh_D08G1823	GH_D08G1953	Ghir_D08G018530.1	GrTIP2;3b	Gorai.004G197600.1	GbTIP2;3b_Dt	GB_D08G2037	Gbar_D08G019050.1
GhTIP3;2_At	A03	256	7.92	27066.6	0.864	Gh_A03G2098	GH_A03G1044	Ghir_A03G010110.1	GaTIP3;2	Ga03G1256	GbTIP3;2_At	GB_A03G1064	Gbar_A03G010060.1
GhTIP3;2_Dt	D02	256	7.84	27112.7	0.871	Gh_D02G1191	GH_D02G1293	Ghir_D02G012240.1	GrTIP3;2	Gorai.005G135200.1	GbTIP3;2_Dt	GB_D02G1336	Gbar_D02G012740.1
GhTIP4;1_At	A06	181	5.86	18553	0.883	Gh_A06G0845	GH_A06G1013	Ghir_A06G009850.1	GaTIP4;1	Ga06G1055	GbTIP4;1_At	GB_A06G1056	Gbar_A06G009740.1
GhTIP4;1_Dt	D06	269	5.48	28395.9	0.94	Gh_D06G0982	GH_D06G1030	Ghir_D06G010230.1	GrTIP4;1	Gorai.010G107900.1	GbTIP4;1_Dt	GB_D06G1070	Gbar_D06G010240.1
GhTIP5;1_At	A07	253	8.73	26146.3	0.95	Gh_A07G0358	GH_A07G0480	-	GaTIP5;1	Ga07G0505	GbTIP5;1_At	GB_A07G0474	Gbar_A07G004510.1
GhTIP5;1_Dt	D07	253	7.86	26023.2	0.969	Gh_D07G0420	GH_D07G0483	Ghir_D07G004760.1	GrTIP5;1	Gorai.001G049000.1	GbTIP5;1_Dt	GB_D07G0481	Gbar_D07G004800.1
GhXIP1;1_At	A01	303	8.22	32234	1.005	Gh_A01G1351	GH_A01G1752	Ghir_A01G015620.1	GaXIP1;1	Ga02G1057	GbXIP1;1_At	GB_A01G1859	Gbar_A01G016020.1
GhXIP1;1_Dt	D01	303	7.65	32291.1	1.009	Gh_D01G1596	GH_D01G1866	Ghir_D01G017090.1	GrXIP1;1	Gorai.002G192500.1	GbXIP1;1_Dt	GB_D01G1955	Gbar_D01G017200.1
GhXIP2;1_At	A12	305	8.57	32552.9	1.011	Gh_A12G0370	GH_A12G0389	Ghir_A12G004070.1	GaXIP2;1	Ga14G1867	GbXIP2;1_At	GB_A12G0397	Gbar_A12G003980.1
GhXIP2;1_Dt	D12	278	8.78	29466.8	1.012	Gh_D12G0295	GH_D12G0314	Ghir_D12G003210.1	GrXIP2;1	Gorai.008G033000.1	GbXIP2;1_Dt	GB_D12G0320	Gbar_D12G003270.1
GhXIP2;2_At	A12	295	7.62	31427	1.046	Gh_A12G0369	GH_A12G0388	Ghir_A12G004060.1	GaXIP2;2	Ga14G1866	GbXIP2;2_At	GB_A12G0396	Gbar_A12G003970.1
GhXIP2;2_Dt	D12	267	8.56	28438.6	1.076	Gh_D12G0296	GH_D12G0315	Ghir_D12G003220.1	GrXIP2;2	Gorai.008G033100.1	-	-	-
The genomic database of four cotton species, G. raimondii, G. arboreum, G. hirsutum acc. TM-1 with different sources, and G. barbadense acc. 3-79 and cv. Hai7124, were all downloaded from the CottonGen database (https://www.cottongen.org/data/download). There were three genomic databases of G. hirsutum acc. TM-1 from different organizations, that from Zhang et al. (2015) named as NAU, Wang et al.…
